# Supplementary material for: Human Leukocyte Antigen and Systemic Sclerosis in Japanese: The Sign of the Four Independent Protective Alleles, DRB1*13:02, DRB1*14:06, DQB1*03:01, and DPB1*02:01
Source: PLOS journal article supplement (doi:10.1371/journal.pone.0154255), 2016-04-26
Supplement: S1 (10.1371/journal.pone.0154255.s001) [file redirect.do]

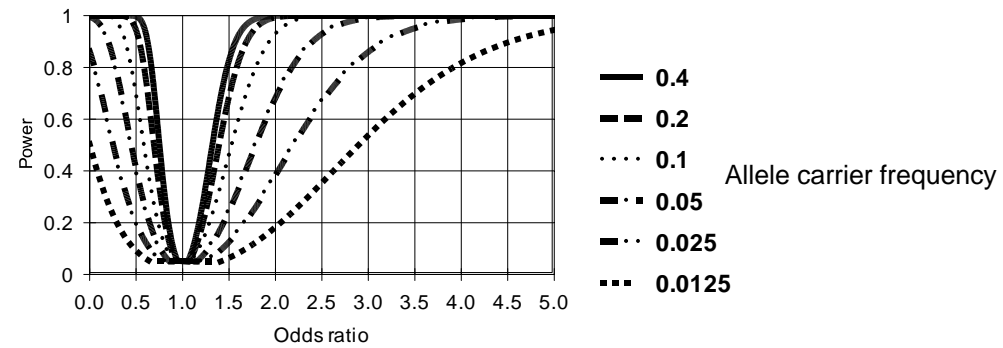

Supplementary Figure 1. The statistical power in each condition of allele carrier frequency and odds ratio was calculated on the comparison between the overall SSc and the control.
